# Supplementary material for: A bionic palladium metal–organic framework based on a fluorescence sensing enhancement mechanism for sensitive detection of phorate
Source: Royal Society of Chemistry journal article supplement (doi:10.1039/d4nr03779k), 2024-11-25
Supplement: d4nr03779k1.pdf [file d4nr03779k1.pdf]

## Supporting Information

### **A Bionic Palladium Metal-organic Framework Based on Fluorescence Sensing Enhancement Mechanism for Sensitive Detection of Phorate**

Mengyao Li <sup>a, b</sup>, Zhijie Wang <sup>b</sup>, Hongyu Tang <sup>b</sup>, Jingru Yang <sup>b</sup>, Xianwei Luo <sup>b</sup>,  
Mingxin Yang <sup>b</sup>, Zhicai Liu <sup>b</sup>, Haoyang Hao <sup>b</sup>, Jinhong Jiang <sup>c</sup>, Meng Wang <sup>b</sup>, Lingna  
Zheng <sup>b</sup>, Chenyan Ma <sup>b</sup>, Gengmei Xing <sup>b</sup>, Hongbin Wang <sup>\*a</sup> and Juan Li <sup>\*b</sup>

<sup>a</sup> School of Biological Engineering, Tianjin University of Science and Technology,  
Tianjin 300457, Tianjin, China

<sup>b</sup> CAS Key Laboratory for Biomedical Effects of Nanomaterial and Nanosafety,  
Institute of High Energy Physics, Chinese Academy of Science (CAS), Beijing  
100049, China

<sup>c</sup> Hangzhou Institute of Medicine Chinese Academy of Sciences, Hangzhou 310063,  
China

\*Email: whb@tust.edu.cn

lijuan@ihep.ac.cn

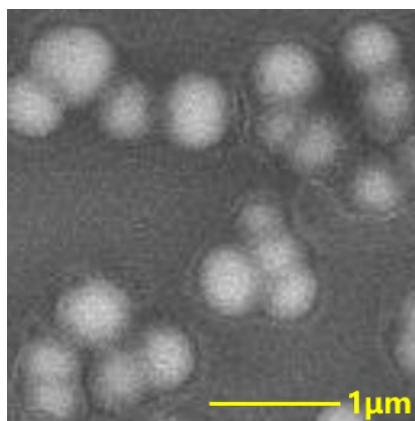

**Supplementary Figure 1.** SEM images of Pd-MOF.

**Supplementary table 1.** Detection result of BET

| Item                                               | Result                      |
|----------------------------------------------------|-----------------------------|
| BET Surface Area                                   | 232.5095 m <sup>2</sup> /g  |
| t-Plot Micropore Area                              | 152.6034 m <sup>2</sup> /g  |
| t-Plot external surface area                       | 79.9061 m <sup>2</sup> /g   |
| Single point adsorption total pore volume of pores | 0.115689 cm <sup>3</sup> /g |
| t-Plot micropore volume                            | 0.058969 cm <sup>3</sup> /g |
| Adsorption average pore diameter                   | 1.9903 nm                   |
| BJH Adsorption average pore diameter               | 3.8167 nm                   |

**Supplementary table 2.** Comparison with previously reported OPPs detection methods

| Probe         | Range                 | LOD                    | Ref.      |
|---------------|-----------------------|------------------------|-----------|
| CBZ-BOD@ZIF-8 | 1-6 $\mu\text{g/mL}$  | 1.15 ng/mL             | 1         |
| LysFP@ZIF-8   | 0-10 $\mu\text{g/mL}$ | 79 ng/mL               | 2         |
| TPE-Peptide   | 1-100 $\mu\text{M}$   | 15.07 $\mu\text{g/kg}$ | 3         |
| MPBOD         | 0-10 $\mu\text{g/mL}$ | 2.15 $\mu\text{g/mL}$  | 4         |
| SiQDs/OPD     | 0.125-12.5 ng/mL      | 0.05 ng/mL             | 5         |
| AuNP          | 12.44-136.22 ng/mL    | 12.44 ng/mL            | 6         |
| Pd-MOF        | 100-0.001 ppb         | 0.001 ppb              | This work |

**Supplementary table 3.** Comparison of energy gap between Pd-MOFs and other

| MOFs        |                 |           |
|-------------|-----------------|-----------|
| MOFs        | Energy gap (eV) | Ref.      |
| Zr-TCPP(Pd) | 1.96            | 7         |
| Zr-TCPP     | 1.68            |           |
| Zn-MOF      | 2.988           | 8         |
| Cd-TCPP     | 1.86            | 9         |
| Fe-TCPP     | 1.473           | 10        |
| Pd-MOFs     | 0.025           | This work |

**Supplementary table 4.** Determination of phorate in samples

| Sample                | Found (ppb)   | Recovery (%)  | RSD(%) |
|-----------------------|---------------|---------------|--------|
|                       | 0             | 0             | 0      |
| Tap water             | 93.05 ± 0.08  | 93.05 ± 0.06  | 6.46   |
|                       | 8.77 ± 0.18   | 87.69 ± 0.02  | 2.06   |
|                       | 1.06 ± 0.04   | 105.66 ± 0.04 | 4.06   |
|                       | 0             | 0             | 0      |
| Peer rinsing water    | 100.83 ± 0.10 | 100.83 ± 0.05 | 4.81   |
|                       | 9.37 ± 0.58   | 93.68 ± 0.06  | 6.15   |
|                       | 1.00 ± 0.07   | 99.65 ± 0.07  | 7.40   |
|                       | 0             | 0             | 0      |
| Pear juice            | 100.69 ± 0.08 | 100.69 ± 0.05 | 4.95   |
|                       | 10.56 ± 1.18  | 105.62 ± 0.12 | 11.16  |
|                       | 1.06 ± 0.07   | 106.12 ± 0.07 | 6.16   |
|                       | 0             | 0             | 0      |
| Cabbage rinsing water | 96.03 ± 0.17  | 96.03 ± 0.08  | 8.25   |
|                       | 9.96 ± 0.52   | 99.57 ± 0.05  | 5.21   |
|                       | 1.01 ± 0.10   | 101.47 ± 0.10 | 9.94   |
|                       | 0             | 0             | 0      |
| Cabbage juice         | 99.05 ± 0.09  | 99.05 ± 0.05  | 4.67   |
|                       | 9.85 ± 0.58   | 98.48 ± 0.06  | 5.88   |
|                       | 0.96 ± 0.04   | 96.19 ± 0.04  | 4.36   |

## References

1. B. Shen, C. Ma, Y. Ji, J. Dai, B. Li, X. Zhang and H. Huang, *ACS Appl Mater Interfaces*, 2021, **13**, 8718-8726.
2. B. Shen, X. Zhang, J. Dai, Y. Ji and H. Huang, *J Hazard Mater*, 2021, **407**, 124342.
3. J. Wang, J. Zhang, J. Wang, G. Fang, J. Liu and S. Wang, *Journal of Hazardous Materials*, 2020, **389**, 122074.
4. C. Ma, J. Wu, W. Sun, Y. Hou, G. Zhong, R. Gao, B. Shen and H. Huang, *Sensors and Actuators B: Chemical*, 2020, **325**, 128798.
5. R. Jin, D. Kong, X. Yan, X. Zhao, H. Li, F. Liu, P. Sun, Y. Lin and G. Lu, *ACS Appl Mater Interfaces*, 2019, **11**, 27605-27614.
6. J. Sun, L. Guo, Y. Bao and J. Xie, *Biosens Bioelectron*, 2011, **28**, 152-157.
7. H. Zhang, Q. Li, B. Weng, L. Xiao, Z. Tian, J. Yang, T. Liu and F. Lai, *Chemical Engineering Journal*, 2022, **442**, 136144.
8. L. Yu, K. W. Lee, Y. Q. Zhao, Y. Xu, Y. Zhou, M. Li and J. S. Kim, *Inorg Chem*, 2023, **62**, 18767-18778.
9. W. Xu, J. Wang, H. Yu, P. Liu, G.-R. Zhang, H. Huang and D. Mei, *Applied Catalysis B: Environmental*, 2022, **308**, 121218.
10. M. Li, A. Shen, M. Du, X. Hao, X. Du, J. Yuan, S. Ma, Y. Zhao, L. Hou, Z. Li and Y. Yang, *Journal of Environmental Chemical Engineering*, 2022, **10**, 108944.
